# Supplementary material
Source: HighWire-hosted journal article supplement (https://cmajopen.ca/highwire/filestream/90665/field_highwire_adjunct_files/0/open-2023-0042-1-at.pdf)
Supplement: open-2023-0042-1-at.pdf [file open-2023-0042-1-at.pdf]

Appendix A: INTERVIEW GUIDE

**Canadian physician mothers and their experiences with labour and delivery**

*Do physician mothers believe that their profession has an impact on their delivery outcomes?*

**Preamble**

Thank you for agreeing to participate in this interview. I am interviewing you to better understand the birth experiences clinician mothers. Because I am interested in your experience, there are no right or wrong answers to any of my questions.

You have signed the consent form and are aware of your rights as a participant. The interview should take approximately 30 to 60 minutes depending on how much information you would like to share. With your permission, I would like to audio record the interview because I don't want to miss any of your comments. All responses will be kept confidential. You may decline to answer any question or stop participating in the interview at any time and for any reason. May I turn on the digital recorder?

**Interview Questions:**

- 1) Could you please describe your professional role and the scope of your professional practice?
- 2) Do you feel that your professional status has any impact on the healthcare that you receive, both in general and with respect to your most recent pregnancy and birth?
  - a. Probes: communication with healthcare personnel; self-monitoring of pregnancy
- 3) How would you define "birth complications?"
  - a. Probes: use of technology, medical complications for mother and baby
- 4) Please briefly describe your most recent birth experience.
  - a. Probes: did you have a complicated birth? If so, what was complicated about it?
- 5) Do you feel that your professional status shaped your birth experience in any way? If so, how?
- 6) Do you have any other concerns or thoughts that you would like to share?

Thank you for your time!
